# Supplementary material for: Sunlight exposure in infancy decreases risk of sporadic retinoblastoma, extent of intraocular disease
Source: PubMed Central journal article supplement (PMC8714544; doi:10.1002/cnr2.1409), 2021-05-07
Supplement: CNR2-4-e1409-s001.pdf [file CNR2-4-e1409-s001.pdf]

**EpiRbMx study**  
Recruited through  
Feb. 2018  
N=511

**Cases**  
N=379

**Controls**  
N=132

**Excluded**  
N=1  
*No maternal  
education data*

**Unilateral cases**  
N=259

**Bilateral cases**  
N=120

**Informative  
Controls**  
N=131

**Excluded**  
N=1  
*No elevation  
data*

**Excluded**  
N=1  
*No elevation  
data*

**Unilateral cases  
with elevation**  
N=258

**Bilateral cases with  
elevation**  
N=119

**Excluded**  
N=3  
*No staging data*

**Excluded**  
N=13  
*No staging data*

**Unilateral cases  
with staging and  
elevation**  
N=245

**Bilateral cases with  
staging and  
elevation**  
N=116

**Unilateral  
subgroup queried  
about time of day  
of sun exposure**  
N=26

**Bilateral subgroup  
queried about time  
of day of sun  
exposure**  
N=10
