# Supplementary material for: Sunlight exposure in infancy decreases risk of sporadic retinoblastoma, extent of intraocular disease
Source: PubMed Central journal article supplement (PMC8714544; doi:10.1002/cnr2.1409), 2021-05-07

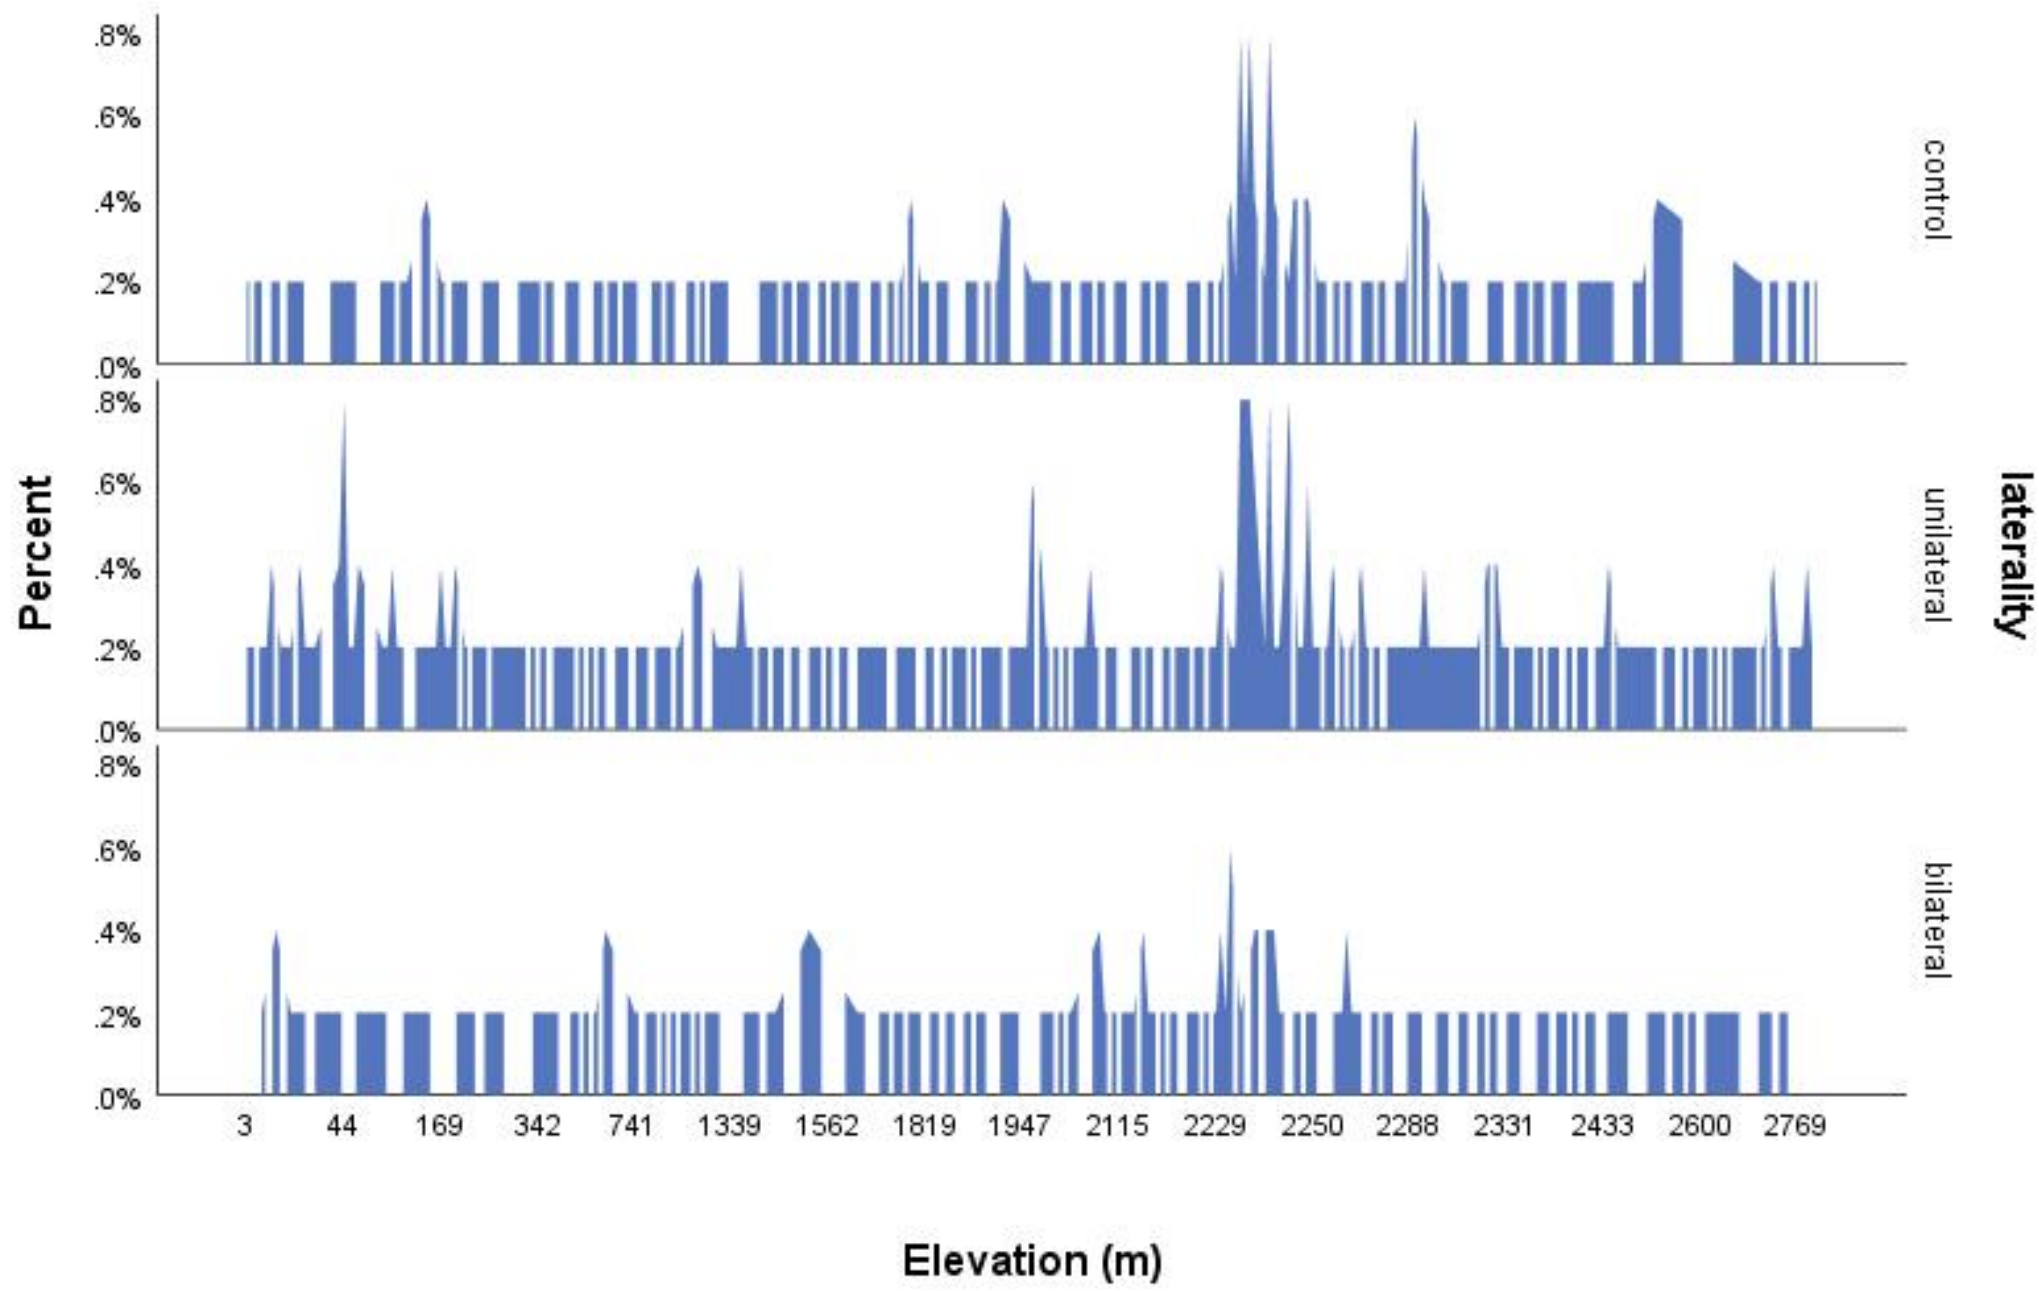

Supplement: CNR2-4-e1409-s002.pdf [file CNR2-4-e1409-s002.pdf]
